# Supplementary material
Source: PubMed Central journal article supplement (PMC4248880)
Supplement: JB.01590-14_zjb999093348so1.pdf [file JB.01590-14_zjb999093348so1.pdf]

## Near real-time analysis of the phenotypic responses of *Escherichia coli* to 1-butanol exposure using Raman spectroscopy

Theresah N. K. Zu, Ahmad I. M. Athamneh, Robert S. Wallace, Eva Collakova, and Ryan S. Senger

### Supplementary Appendix

**Supplementary Table 1.** Correlation coefficients (R values) for FAME analysis data with Raman spectroscopy data using Raman bands assigned in the literature and new bands identified in this research.

| Raman Band (cm <sup>-1</sup> ) | Saturated Fatty Acids (R) | Unsaturated Fatty Acids (R) | Cyclopropane Fatty Acids (R) | Raman Signature Assignment                 | References |
|--------------------------------|---------------------------|-----------------------------|------------------------------|--------------------------------------------|------------|
| 877                            | 0.014                     | -                           | -                            | Symmetric stretching (C-C-N <sup>+</sup> ) | (1)        |
| 968                            | -                         | -                           | -                            | Lipids                                     | (1)        |
| 980                            | 0.20                      | -                           | -                            | Bending (=CH)                              | (1)        |
| 1057                           | -                         | 0.37                        | -                            | Lipids                                     | (1)        |
| 1064                           | -                         | 0.09                        | -                            | Vibrational stretch (C-C)                  | (1)        |
| 1078                           | -                         | -                           | -                            | Vibrational stretch (C-C) (C-O)            | (1)        |
| 1095                           | -                         | 0.64                        | -                            | Lipids                                     | (1)        |
| 1123                           | 0.33                      | -                           | 0.56                         | Vibrational stretch (C-C)                  | (1, 2)     |
| 1131                           | 0.02                      | -                           | 0.37                         | Fatty Acid                                 | (1)        |
| 1168                           | -                         | -                           | 0.14                         | Lipid Assignment (C=C) (COH)               | (1)        |
| 1249                           | -                         | 0.53                        | -                            | Bend (=CH)                                 | (3)        |
| 1250                           | -                         | 0.57                        | -                            | Bend (=CH)                                 | (3)        |
| 1251                           | -                         | 0.60                        | -                            | Bend (=CH)                                 | (3)        |
| 1252                           | -                         | 0.59                        | -                            | Bend (=CH)                                 | (3)        |
| 1253                           | -                         | 0.60                        | -                            | Bend (=CH)                                 | (3)        |
| 1254                           | -                         | 0.60                        | -                            | Bend (=CH)                                 | (3)        |
| 1255                           | -                         | 0.61                        | -                            | Lipids, Bend (=CH)                         | (1, 3)     |
| 1256                           | -                         | 0.62                        | -                            | Bend (=CH)                                 | (3)        |
| 1257                           | --                        | 0.64                        | -                            | Bend (=CH)                                 | (3)        |

|      |      |      |      |                                                                          |           |
|------|------|------|------|--------------------------------------------------------------------------|-----------|
| 1258 | -    | 0.66 | -    | Bend (=CH)                                                               | (3)       |
| 1259 | -    | 0.69 | -    | Bend (=CH)                                                               | (3)       |
| 1260 | -    | 0.72 | -    | Bend, <i>cis</i> Stretch (=CH),<br>Deformation (-CH <sub>2</sub> )       | (1, 3, 4) |
| 1263 | -    | 0.76 | -    | Bend, Symmetric Rocking<br>(=CH)                                         | (2, 3)    |
| 1264 | -    | 0.75 | -    | Bend (=CH)                                                               | (3)       |
| 1265 | -    | 0.71 | -    | Bend (=CH)                                                               | (3)       |
| 1266 | -    | 0.64 | -    | Bend (=CH), <i>cis</i> Deformation<br>(=CH)                              | (1, 3, 5) |
| 1267 | -    | 0.55 | -    | Lipid (CH), Bend (=CH)                                                   | (1, 3)    |
| 1268 | -    | 0.46 | -    | Deformation (=CH)                                                        | (1)       |
| 1270 | -    | 0.40 | -    | Lipid assignment (C=C)                                                   | (1)       |
| 1298 | -    | 0.12 | 0.30 | Palmitic Acid, Acyl Chains,<br>Fatty Acids                               | (1)       |
| 1299 | -    | 0.03 | 0.40 | Deformation (CH <sub>2</sub> )                                           | (1)       |
| 1300 | 0.07 | -    | 0.48 | Twist (-CH <sub>2</sub> )                                                | (2)       |
| 1301 | 0.16 | -    | 0.54 | Vibration (-CH)<br>Twist (-CH <sub>2</sub> )                             | (1, 3)    |
| 1302 | 0.23 | -    | 0.59 | Lipid Assignment, Bend, Twist<br>(-CH <sub>3</sub> ) (-CH <sub>2</sub> ) | (1)       |
| 1304 | 0.29 | -    | 0.64 | Deformation (-CH <sub>2</sub> )                                          | (1)       |
| 1307 | 0.2  | -    | 0.60 | Bend, Twist (-CH <sub>3</sub> ) (-CH <sub>2</sub> )                      | (1)       |
| 1309 | 0.02 | -    | 0.49 | Bend, Twist (-CH <sub>3</sub> ) (-CH <sub>2</sub> )                      | (1)       |
| 1313 | -    | 0.31 | 0.11 | Twist (-CH <sub>2</sub> CH <sub>3</sub> )                                | (1)       |
| 1367 | -    | 0.03 | 0.47 | Phospholipids, Symmetric<br>Vibration (-CH <sub>3</sub> )                | (1)       |
| 1379 | -    | 0.02 | 0.31 | Lipid Assignment                                                         | (1)       |
| 1393 | 0.16 | -    | 0.53 | Rocking (CH)                                                             | (1)       |
| 1437 | 0.10 | -    | -    | Deformation (CH <sub>2</sub> )                                           | (1)       |
| 1439 | 0.2  | -    | -    | Deformation, Scissoring (CH <sub>2</sub> )                               | (1)       |
| 1440 | 0.24 | -    | -    | Deformation (CH) (CH <sub>2</sub> ) (CH <sub>3</sub> )                   | (1)       |

|      |      |      |      |                                                                                                                        |     |
|------|------|------|------|------------------------------------------------------------------------------------------------------------------------|-----|
| 1441 | 0.28 | -    | -    | Deformation, Bend, Scissoring (CH) (CH <sub>2</sub> ) (CH <sub>3</sub> )                                               | (1) |
| 1442 | 0.31 | -    | -    | Fatty Acids, Deformation, Bend (CH <sub>2</sub> ) (CH <sub>3</sub> )                                                   | (1) |
| 1443 | 0.32 | -    | -    | Fatty Acids, Deformation (CH <sub>2</sub> )                                                                            | (1) |
| 1444 | 0.32 | -    | -    | Fatty Acids, Deformation (CH <sub>2</sub> )                                                                            | (1) |
| 1445 | 0.3  | -    | -    | Phospholipids, Deformation, Bend, Scissoring (CH <sub>2</sub> ) (CH <sub>3</sub> ) (-CH <sub>2</sub> CH <sub>3</sub> ) | (1) |
| 1446 | 0.26 | -    | -    | Deformation, Bend (CH <sub>2</sub> )                                                                                   | (1) |
| 1447 | 0.2  | -    | -    | Deformation, Bend (CH <sub>2</sub> )                                                                                   | (1) |
| 1448 | 0.13 | 0.00 | -    | Deformation (CH <sub>2</sub> ) (-CH <sub>2</sub> CH <sub>3</sub> )                                                     | (1) |
| 1449 | 0.05 | 0.09 | -    | Lipids, Vibration (CH)                                                                                                 | (1) |
| 1450 | -    | 0.18 | -    | Deformation, Bend (CH <sub>2</sub> ) (CH)                                                                              | (1) |
| 1451 | -    | 0.26 | -    | Deformation (-CH <sub>2</sub> CH <sub>3</sub> )                                                                        | (1) |
| 1454 | -    | 0.27 | -    | Overlapping Asymmetric CH <sub>3</sub> Bending and CH <sub>2</sub> Scissoring                                          | (1) |
| 1460 | -    | 0.21 | -    | Deformation (CH <sub>2</sub> ) (CH <sub>3</sub> )                                                                      | (1) |
| 1465 | -    | 0.40 | -    | Lipids                                                                                                                 | (1) |
| 1525 | -    | 0.27 | -    | Vibration (C=C)                                                                                                        | (1) |
| 1554 | 0.38 | -    | 0.79 | Discovered in this research                                                                                            |     |
| 1580 | -    | -    | 0.54 | Stretching (C-C)                                                                                                       | (1) |
| 1582 | 0.06 | -    | 0.60 | Discovered in this research                                                                                            |     |
| 1585 | 0.16 | -    | 0.65 | Olefinic Stretch (C=C)                                                                                                 | (1) |
| 1607 | 0.60 | -    | 0.82 | Discovered in this research                                                                                            |     |
| 1616 | 0.68 | -    | 0.79 | Discovered in this research                                                                                            |     |
| 1628 | -    | 0.13 | 0.30 | Stretch (C=C)                                                                                                          | (1) |
| 1652 | -    | 0.38 | -    | Lipids, Stretch (C=C)                                                                                                  | (1) |
| 1655 | -    | 0.40 | -    | Lipids, Stretch (C=C) (C=O)                                                                                            | (1) |
| 1656 | -    | 0.37 | -    | Lipids, Stretch, <i>cis</i> Vibration (C=C)                                                                            | (1) |
| 1657 | -    | 0.32 | -    | Fatty Acids                                                                                                            | (1) |

|      |      |      |      |                                                                                                         |        |
|------|------|------|------|---------------------------------------------------------------------------------------------------------|--------|
| 1660 | -    | 0.13 | -    | Lipids, Fatty Acids,<br><i>cis</i> Vibration (C=C)                                                      | (1)    |
| 1667 | -    | 0.11 | -    | Stretch (C=C) (C=O)                                                                                     | (1)    |
| 1674 | -    | 0.54 | -    | Stretch (C=C)                                                                                           | (1)    |
| 1734 | -    | 0.21 | -    | Lipids, Stretch (C=O)                                                                                   | (1)    |
| 1736 | -    | 0.18 | -    | Lipids, Esters (C=O)                                                                                    | (1)    |
| 1738 | -    | 0.27 | -    | Lipids                                                                                                  | (1)    |
| 1744 | -    | -    | -    | Lipids (Carbonyl Group)                                                                                 | (1)    |
| 1745 | 0.1  | -    | 0.11 | Lipid Assignment,<br>Phospholipids, Vibration (C=O)                                                     | (1)    |
| 1746 | 0.21 | -    | 0.31 | Lipids, Stretch (C=O)                                                                                   | (1)    |
| 1747 | 0.22 | -    | 0.42 | Lipids (C=O)                                                                                            | (1)    |
| 1750 | -    | -    | 0.10 | Lipids, Fatty Acids (C=C)<br>(C=O)                                                                      | (1)    |
| 1754 | -    | 0.31 | -    | Lipids (C=O)                                                                                            | (1)    |
| 2817 | -    | 0.37 | -    | Symmetric Stretch (-CH <sub>2</sub> )                                                                   | (1)    |
| 2840 | -    | 0.49 | -    | Symmetric Stretch (-CH <sub>3</sub> )                                                                   | (1)    |
| 2850 | -    | 0.19 | 0.10 | Lipids, Fatty Acids, Symmetric<br>Stretch (-CH <sub>2</sub> ) (-CH <sub>3</sub> )                       | (1)    |
| 2855 | 0.52 | -    | 0.53 | Symmetric Stretch (-CH <sub>2</sub> )<br>(-CH <sub>3</sub> ), Asymmetric Stretch<br>(-CH <sub>2</sub> ) | (1, 2) |
| 2856 | 0.59 | -    | 0.58 | Symmetric Stretch (-CH <sub>2</sub> )<br>(-CH <sub>3</sub> ), Asymmetric Stretch<br>(-CH <sub>2</sub> ) | (1, 2) |
| 2858 | 0.60 | -    | 0.60 | Symmetric Stretch (-CH <sub>2</sub> )<br>(-CH <sub>3</sub> ), Asymmetric Stretch<br>(-CH <sub>2</sub> ) | (1, 2) |
| 2859 | 0.55 | -    | 0.56 | Symmetric Stretch (-CH <sub>2</sub> )<br>(-CH <sub>3</sub> ), Asymmetric Stretch<br>(-CH <sub>2</sub> ) | (1, 2) |
| 2868 | 0.76 | -    | 0.63 | Symmetric Stretch (-CH <sub>2</sub> )<br>(-CH <sub>3</sub> ), Asymmetric Stretch                        | (1)    |

|      |      |      |      |                                                                                                         |        |
|------|------|------|------|---------------------------------------------------------------------------------------------------------|--------|
|      |      |      |      | (-CH <sub>2</sub> )                                                                                     |        |
| 2870 | 0.78 | -    | 0.64 | Symmetric Stretch (-CH <sub>2</sub> )<br>(-CH <sub>3</sub> ), Asymmetric Stretch<br>(-CH <sub>2</sub> ) | (1, 6) |
| 2876 | 0.67 | -    | 0.47 | Stretch (-CH), Asymmetric<br>Stretch (-CH <sub>2</sub> )                                                | (1)    |
| 2883 | -    | 0.27 | -    | Stretch (-CH), Asymmetric<br>Stretch (-CH <sub>2</sub> )                                                | (1)    |
| 2889 | -    | 0.17 | 0.22 | Asymmetric Stretch (-CH <sub>2</sub> )                                                                  | (1)    |
| 2893 | -    | 0.20 | 0.21 | Symmetric Stretch (-CH <sub>3</sub> )                                                                   | (1)    |
| 2900 | -    | 0.51 | -    | Stretch (-CH)                                                                                           | (1)    |
| 2910 | 0.67 | -    | 0.52 | Stretch (-CH <sub>3</sub> )                                                                             | (1)    |
| 2915 | 0.74 | -    | 0.47 | Lipids (-CH)                                                                                            | (1)    |
| 2924 | 0.76 | -    | 0.60 | Asymmetric Stretch (-CH <sub>2</sub> )                                                                  | (6, 7) |
| 2930 | 0.79 | -    | 0.50 | Asymmetric Stretch (-CH)                                                                                | (2)    |
| 2933 | 0.81 | -    | 0.47 | Asymmetric Stretch (-CH)                                                                                | (1)    |
| 2940 | 0.62 | -    | 0.38 | Vibration (-CH) (-CH <sub>2</sub> )                                                                     | (1)    |
| 2954 | -    | 0.23 | -    | Asymmetric Stretch (-CH <sub>3</sub> )                                                                  | (6)    |
| 2956 | -    | 0.51 | -    | Asymmetric Stretch (-CH <sub>3</sub> )                                                                  | (1)    |
| 2960 | -    | 0.65 | -    | Asymmetric Stretch (-CH <sub>3</sub> )                                                                  | (1)    |
| 2970 | -    | 0.55 | -    | Asymmetric Stretch (-CH <sub>3</sub> )                                                                  | (1, 5) |
| 3008 | -    | 0.52 | -    | Lipids, Fatty Acids, Asymmetric<br>Stretch (=CH)                                                        | (1)    |
| 3010 | -    | 0.36 | -    | Unsaturated Fatty Acids, Stretch<br>(=CH)                                                               | (1)    |
| 3015 | 0.04 | 0.08 | -    | Lipids, Vibration (=CH)                                                                                 | (1)    |

\* Negative correlation coefficients are represented by a dash.

**Supplementary Table 2.** All literature cited Raman bands considered for each amino acid (8, 9) for compiling the optimized results shown in Table 1.

| <b>Amino Acids</b> | <b>Associated Raman Bands (cm<sup>-1</sup>)</b>                                                                                                                   |
|--------------------|-------------------------------------------------------------------------------------------------------------------------------------------------------------------|
| Ala                | 399, 533, 771, 852, 922, 1021, 1115, 1149, 1308, 1361, 1378, 1411, 1464, 1485, 1599                                                                               |
| Arg                | 857, 873, 930, 985, 1036, 1086, 1176, 1199, 1264, 1310, 1317, 1408, 1423, 1443, 1477                                                                              |
| Asp/Asn            | 749, 779, 877, 939, 1084, 1125, 1338, 1408, 1426, 1695                                                                                                            |
| Cys                | 455, 499, 542, 613, 678, 785, 873, 967, 1341, 1385, 1410                                                                                                          |
| Glu/Gln            | 623, 669, 873, 917, 988, 1080, 1182, 1319, 1379, 1422, 1462, 1637, 1682                                                                                           |
| Gly                | 359, 496, 603, 898, 1036, 1327, 1332, 1413, 1442, 1458, 1515                                                                                                      |
| His                | 539, 657, 731, 784, 806, 854, 919, 929, 964, 977, 1062, 1088, 1113, 1176, 1225, 1252, 1272, 1319, 1336, 1349, 1355, 1409, 1431, 1443, 1500, 1578                  |
| Ile                | 536, 557, 675, 765, 820, 825, 852, 873, 918, 964, 993, 1017, 1033, 1134, 1168, 1191, 1257, 1309, 1329, 1338, 1355, 1398, 1413, 1421, 1448, 1465, 1514, 1583, 1619 |
| Leu                | 771, 836, 848, 1135, 1178, 1187, 1243, 1342, 1410, 1457, 1583, 1623                                                                                               |
| Lys                | 625, 785, 849, 877, 912, 946, 975, 988, 1036, 1055, 1064, 1072, 1097, 1141, 1168, 1305, 1321, 1341, 1360, 1399, 1414, 1433, 1447, 1456, 1464, 1485, 1609          |
| Met                | 645, 682, 700, 721, 765, 805, 877, 1068, 1175, 1245, 1265, 1321, 1343, 1355, 1415, 1428, 1447                                                                     |
| Phe                | 469, 525, 606, 622, 748, 821, 835, 915, 954, 1005, 1036, 1158, 1188, 1214, 1310, 1413, 1608                                                                       |
| Pro                | 642, 843, 899, 921, 986, 1035, 1084, 1239, 1453                                                                                                                   |
| Ser                | 610, 805, 814, 854, 857, 969, 1010, 1127, 1220, 1301, 1327, 1417, 1468                                                                                            |
| Thr                | 447, 564, 872, 932, 1045, 1116, 1251, 1341, 1410, 1419, 1458                                                                                                      |
| Trp                | 756, 759, 849, 875, 961, 1010, 1013, 1078, 1120, 1233, 1253, 1340, 1360, 1426, 1460, 1489, 1559                                                                   |
| Tyr                | 641, 798, 831, 847, 986, 1044, 1180, 1201, 1267, 1328, 1615                                                                                                       |
| Val                | 542, 665, 753, 776, 825, 850, 902, 948, 965, 1000, 1066, 1100, 1126, 1200, 1273, 1300, 1331, 1354, 1396, 1400, 1427, 1454, 1467, 1509                             |

**Supplementary Table 3.** Alternative Raman band assignment Set 1 for amino acids. Correlation coefficient (R) between Raman and UPLC data = 0.86.

| <b>Amino Acids</b> | <b>Optimum Raman Band (cm<sup>-1</sup>)</b> | <b>Amino Acid Composition Determined by Raman</b> | <b>Amino Acid Composition Determined by UPLC</b> | <b>Published Amino Acid Composition</b> |
|--------------------|---------------------------------------------|---------------------------------------------------|--------------------------------------------------|-----------------------------------------|
| Ala                | 1308                                        | 11.4                                              | 11.1                                             | 9.60                                    |
| Arg                | 1423                                        | 3.53                                              | 3.39                                             | 5.53                                    |
| Asp/Asn            | 1338                                        | 11.9                                              | 8.98                                             | 9.01                                    |
| Cys                | 785                                         | 4.47                                              | 1.64*                                            | 1.64                                    |
| Glu/Gln            | 1637                                        | 6.75                                              | 9.16                                             | 9.84                                    |
| Gly                | 1327                                        | 10.9                                              | 12.0                                             | 11.5                                    |
| His                | 854                                         | 2.01                                              | 0.890                                            | 1.77                                    |
| Ile                | 1329                                        | 11.2                                              | 8.76                                             | 5.43                                    |
| Leu                | 1457                                        | 11.7                                              | 11.4                                             | 8.42                                    |
| Lys                | 1168                                        | 2.19                                              | 5.24                                             | 6.41                                    |
| Met                | 877                                         | 1.63                                              | 0.467                                            | 2.87                                    |
| Phe                | 1413                                        | 3.05                                              | 4.59                                             | 3.46                                    |
| Pro                | 843                                         | 0.749                                             | 1.02                                             | 4.13                                    |
| Ser                | 1010                                        | 4.50                                              | 4.42                                             | 4.03                                    |
| Thr                | 1116                                        | 3.48                                              | 6.26                                             | 4.74                                    |
| Trp                | 1426                                        | 3.68                                              | 1.06*                                            | 1.06                                    |
| Tyr                | 641                                         | 1.69                                              | 0.390                                            | 2.58                                    |
| Val                | 1126                                        | 5.20                                              | 9.22                                             | 7.91                                    |
| Sum                | -                                           | 100                                               | 100                                              | 100                                     |

\* Values for Cys and Trp could not be resolved by the UPLC method. Cys is converted to several oxidation products, while Trp is destroyed during acidic protein hydrolysis used in this research. The published literature values were used for Cys and Trp.

\*\* Amino acid composition is defined as the fraction of each amino acid in *E. coli* total protein.

\*\*\* Possible overlapping bands: Gly (1327 cm<sup>-1</sup>) / Ile (1329 cm<sup>-1</sup>); Arg (1423 cm<sup>-1</sup>) / Trp (1426 cm<sup>-1</sup>)

**Supplementary Table 4.** Alternative Raman band assignment Set 2 for amino acids. Correlation coefficient (R) between Raman and UPLC data = 0.89.

| <b>Amino Acids</b> | <b>Optimum Raman Band (cm<sup>-1</sup>)</b> | <b>Amino Acid Composition Determined by Raman</b> | <b>Amino Acid Composition Determined by UPLC</b> | <b>Published Amino Acid Composition</b> |
|--------------------|---------------------------------------------|---------------------------------------------------|--------------------------------------------------|-----------------------------------------|
| Ala                | 1308                                        | 12.0                                              | 11.1                                             | 9.60                                    |
| Arg                | 1199                                        | 2.67                                              | 3.39                                             | 5.53                                    |
| Asp/Asn            | 1338                                        | 12.5                                              | 8.98                                             | 9.01                                    |
| Cys                | 499                                         | 1.57                                              | 1.64*                                            | 1.64                                    |
| Glu/Gln            | 1637                                        | 7.10                                              | 9.16                                             | 9.84                                    |
| Gly                | 1442                                        | 10.7                                              | 12.0                                             | 11.5                                    |
| His                | 964                                         | 1.89                                              | 0.890                                            | 1.77                                    |
| Ile                | 1355                                        | 7.03                                              | 8.76                                             | 5.43                                    |
| Leu                | 1457                                        | 12.3                                              | 11.4                                             | 8.42                                    |
| Lys                | 1064                                        | 2.55                                              | 5.24                                             | 6.41                                    |
| Met                | 1068                                        | 3.13                                              | 0.467                                            | 2.87                                    |
| Phe                | 1413                                        | 3.21                                              | 4.59                                             | 3.46                                    |
| Pro                | 843                                         | 0.787                                             | 1.02                                             | 4.13                                    |
| Ser                | 1417                                        | 3.46                                              | 4.42                                             | 4.03                                    |
| Thr                | 1116                                        | 3.66                                              | 6.26                                             | 4.74                                    |
| Trp                | 849                                         | 1.57                                              | 1.06*                                            | 1.06                                    |
| Tyr                | 641                                         | 1.77                                              | 0.390                                            | 2.58                                    |
| Val                | 1331                                        | 12.1                                              | 9.22                                             | 7.91                                    |
| Sum                | -                                           | 100                                               | 100                                              | 100                                     |

\* Values for Cys and Trp could not be resolved by the UPLC method. Cys is converted to several oxidation products, while Trp is destroyed during acidic protein hydrolysis used in this research. The published literature values were used for Cys and Trp.

\*\* Amino acid composition is defined as the fraction of each amino acid in *E. coli* total protein.

\*\*\* Possible overlapping bands: Pro (843 cm<sup>-1</sup>) / Trp (849 cm<sup>-1</sup>); Lys (1064 cm<sup>-1</sup>) / Met (1068 cm<sup>-1</sup>); Val (1331 cm<sup>-1</sup>) / Asp/Asn (1338 cm<sup>-1</sup>)



**Supplementary Table 5.** Alternative Raman band assignment Set 3 for amino acids. Correlation coefficient (R) between Raman and UPLC data = 0.85.

| <b>Amino Acids</b> | <b>Optimum Raman Band (cm<sup>-1</sup>)</b> | <b>Amino Acid Composition Determined by Raman</b> | <b>Amino Acid Composition Determined by UPLC</b> | <b>Published Amino Acid Composition</b> |
|--------------------|---------------------------------------------|---------------------------------------------------|--------------------------------------------------|-----------------------------------------|
| Ala                | 1464                                        | 10.5                                              | 11.1                                             | 9.60                                    |
| Arg                | 1036                                        | 1.97                                              | 3.39                                             | 5.53                                    |
| Asp/Asn            | 1426                                        | 3.83                                              | 8.98                                             | 9.01                                    |
| Cys                | 1385                                        | 4.08                                              | 1.64*                                            | 1.64                                    |
| Glu/Gln            | 1319                                        | 11.6                                              | 9.16                                             | 9.84                                    |
| Gly                | 1332                                        | 12.2                                              | 12.0                                             | 11.5                                    |
| His                | 964                                         | 1.87                                              | 0.890                                            | 1.77                                    |
| Ile                | 1257                                        | 8.66                                              | 8.76                                             | 5.43                                    |
| Leu                | 1457                                        | 12.2                                              | 11.4                                             | 8.42                                    |
| Lys                | 785                                         | 4.65                                              | 5.24                                             | 6.41                                    |
| Met                | 765                                         | 1.22                                              | 0.467                                            | 2.87                                    |
| Phe                | 1214                                        | 6.20                                              | 4.59                                             | 3.46                                    |
| Pro                | 986                                         | 2.38                                              | 1.02                                             | 4.13                                    |
| Ser                | 805                                         | 1.73                                              | 4.42                                             | 4.03                                    |
| Thr                | 1116                                        | 3.63                                              | 6.26                                             | 4.74                                    |
| Trp                | 1078                                        | 4.42                                              | 1.06*                                            | 1.06                                    |
| Tyr                | 798                                         | 1.82                                              | 0.390                                            | 2.58                                    |
| Val                | 1354                                        | 7.10                                              | 9.22                                             | 7.91                                    |
| Sum                | -                                           | 100                                               | 100                                              | 100                                     |

\* Values for Cys and Trp could not be resolved by the UPLC method. Cys is converted to several oxidation products, while Trp is destroyed during acidic protein hydrolysis used in this research. The published literature values were used for Cys and Trp.

\*\* Amino acid composition is defined as the fraction of each amino acid in *E. coli* total protein.

\*\*\* Possible overlapping bands: Tyr (798 cm<sup>-1</sup>) / Ser (805 cm<sup>-1</sup>)

## REFERENCES

1. **Movasaghi Z, Rehman S, Rehman IU.** 2007. Raman spectroscopy of biological tissues. *Appl Spectrosc Rev* **42**:493-541.
2. **Afseth NK, Segtnan VH, Marquardt BJ, Wold JP.** 2005. Raman and near-infrared spectroscopy for quantification of fat composition in a complex food model system. *Appl Spectrosc* **59**:1324-1332.
3. **Notingher I.** 2007. Raman spectroscopy cell-based biosensors. *Sensors* **7**:1343-1358.
4. **Wu H, Volponi JV, Oliver AE, Parikh AN, Simmons BA, Singh S.** 2011. In vivo lipidomics using single-cell Raman spectroscopy. *Proc Natl Acad Sci U S A* **108**:3809-3814.
5. **Lee T-H, Chang J-S, Wang H-Y.** 2013. Rapid and in vivo quantification of cellular lipids in *Chlorella vulgaris* using near-infrared Raman spectrometry. *Anal Chem* **85**:2155-2160.
6. **Schultz ZD, Levin IW.** 2011. Vibrational spectroscopy of biomembranes. *Annu Rev Anal Chem* **4**:343-366.
7. **Cherney DP, Conboy JC, Harris JM.** 2003. Optical-trapping Raman microscopy detection of single unilamellar lipid vesicles. *Anal Chem* **75**:6621-6628.
8. **Zhu G, Zhu X, Fan Q, Wan X.** 2011. Raman spectra of amino acids and their aqueous solutions. *Spectrochimica acta. Part A, Molecular and biomolecular spectroscopy* **78**:1187-1195.
9. **Neidhardt FC, Ingraham JL, Schaechter M.** 1990. *Physiology of the bacterial cell: a molecular approach.* Sinauer Associates Sunderland, MA.
